# Supplementary material
Source: Springer Nature journal article supplement (https://www.springermedizin.de/resource/supplementary/12895_2010_99_MOESM1_ESM.pdf/9514100)
Supplement: MOESM1 [file 9514100]

505 subjects  
screened

Families Enrolled  
N=73

Children Enrolled  
N=132

Safety Population  
N=132

ITT Population  
N=132

Per Protocol Population  
N=108

Tea Tree/  
Lavender  
Oil product  
N=43

Suffocation  
product  
N=45

Pyrethrins/  
Piperonyl  
butoxide  
product  
N=44

Tea Tree/  
Lavender  
Oil product  
N=41

Suffocation  
product  
N=37

Pyrethrins/  
Piperonyl  
butoxide  
product  
N=30

Tea Tree/  
Lavender  
Oil product  
N=43

Suffocation  
product  
N=45

Pyrethrins/  
Piperonyl  
butoxide  
product  
N=44

Tea Tree/  
Lavender  
Oil product  
Evaluable  
at Day 15  
N=42

Suffocation  
product  
Evaluable  
at Day 15  
N=41

Pyrethrins/  
Piperonyl  
butoxide  
product  
Evaluable at  
Day 8  
N=40
